# Supplementary material
Source: publisher figshare collection journal article supplement (https://acs.figshare.com/ndownloader/files/3815377)
Supplement: Supplementary file 1 [file 3815377]

# **Supporting Information Cover Sheet**

## **Influence of the Surface Structure of Graphene Oxide on the Adsorption of Aromatic Organic Compounds from Water**

Han Yan, Hu Wu, Kun Li, Yawen Wang, Xue Tao, Hu Yang\*,  
Aimin Li, Rongshi Cheng

State Key Laboratory of Pollution Control and Resource Reuse, School of the  
Environment, School of Chemistry and Chemical Engineering, Nanjing University,  
Nanjing 210023, P.R. China

Number of pages: 6

Number of texts: 2

Number of figures: 1

---

\* Corresponding author, Tel & Fax: 86-25-89681272

Email: yanghu@nju.edu.cn

## Table of Contents

| <b>Index</b>     | <b>Captions</b>                                                                                                                                                                                                  | <b>Page</b> |
|------------------|------------------------------------------------------------------------------------------------------------------------------------------------------------------------------------------------------------------|-------------|
| <b>Text S1</b>   | The procedure of Boehm titration of GO.                                                                                                                                                                          | S3          |
| <b>Text S2</b>   | The procedure of surface area determination by methylene blue titration.                                                                                                                                         | S4          |
| <b>Fig. S1</b>   | Line shape analysis for the C1s XPS spectra of GO1 (a), GO2 (b), GO3 (c), GO4 (d), and GO5 (e). The dashed line in each figure indicates the composite curve of the constituent lines shown by thin solid lines. | S5          |
| <b>Reference</b> |                                                                                                                                                                                                                  | S6          |

**Text S1** The procedure of Boehm titration of GO <sup>R1</sup>.

Boehm titration method <sup>R1</sup> has been carried out to determine the amount surface oxygen-containing groups on GO.

Before the titration, GO underwent pretreatments to protonate all the neutralizable groups. Sufficient amount of GO sample was dispersed and equilibrated with excess 0.1 mol dm<sup>-3</sup> HCl for 2 days, then thoroughly washed with deionized water to remove HCl, and vacuum dried in 333 K for 48 hours. Three protonated GO samples, each 0.2 g, was mixed with 100 cm<sup>3</sup> of 0.02 mol dm<sup>-3</sup> NaOH, 50 cm<sup>3</sup> of 0.01 mol dm<sup>-3</sup> Na<sub>2</sub>CO<sub>3</sub> and 50 cm<sup>3</sup> of 0.01 mol dm<sup>-3</sup> NaHCO<sub>3</sub>, respectively. The mixtures were shaken for 24 hours and then centrifuged at 10000 rpm for 10 min, followed by filtration using 0.22 micron filters to remove the GOs. 15 cm<sup>3</sup> of the filtrate was mixed with 15 cm<sup>3</sup> 0.02 mol dm<sup>-3</sup> HCl and the excess acid was titrated with 0.01 mol dm<sup>-3</sup> NaOH, using a pH meter as reference. Surface acidity was calculated based on the assumption that NaHCO<sub>3</sub> neutralizes carboxyl groups only, Na<sub>2</sub>CO<sub>3</sub> neutralizes carboxyl and lactonic groups, and NaOH neutralizes all acidic groups including carboxyl, lactonic, and phenolic groups. Blank experiments without GO were also carried out for all experimental conditions.

**Text S2** The procedure of surface area determination by methylene blue titration<sup>R2</sup>.

This method is based on the principle and methods proposed by Pedro Montes-Navajas et al<sup>R2</sup>. In the experiment, about 3 mg of GO sample was carefully weighted and fully dispersed in 100 cm<sup>3</sup> of deionized water. The mixture was titrated using 50 mg dm<sup>-3</sup> methylene blue solution. The terminal was set at the point when clear gree-blue aggregates formed and the supernatant was colorless. Then the surface area of the GO samples was calculated according to the following equation,

$$A = \frac{CV}{m} \times A_{MB} \quad (S1)$$

Where  $A$  (m<sup>2</sup> g<sup>-1</sup>) is the surface area of a GO sample;  $C$  (mg dm<sup>-3</sup>) is the concentration of the methylene blue solution;  $V$  (cm<sup>3</sup>) is the volume of the methylene blue solution;  $m$  (mg) is the mass of the GO sample, and  $A_{MB}$  (m<sup>2</sup> mg<sup>-1</sup>) is the cover area of 1 mg of methylene blue molecules which is 2.54 m<sup>2</sup> mg<sup>-1</sup>.

For lowly-oxidized GO samples, the titration results not directly available as the terminal point is very difficult to determine. It was roughly deduced by the methylene blue uptake of the GO sample with the terminal uptake of a GO sample with a known surface area.

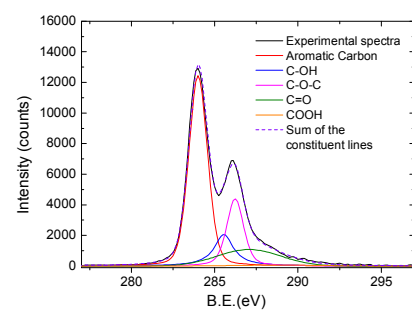

(a)

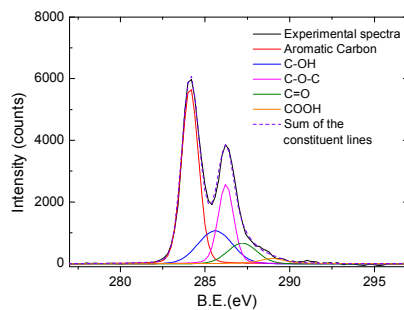

(b)

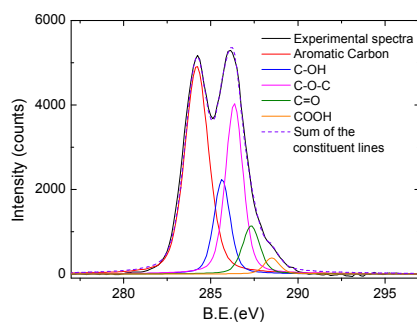

(c)

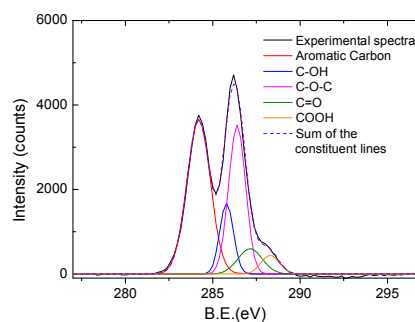

(d)

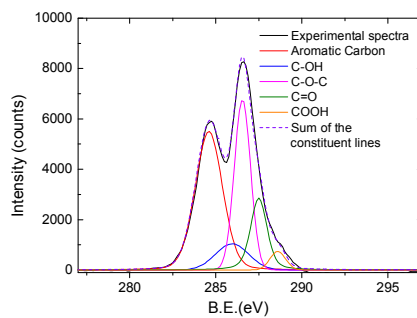

(e)

**Fig. S1** Line shape analysis for the C1s XPS spectra of GO1 (a), GO2 (b), GO3 (c), GO4 (d), and GO5 (e). The dashed line in each figure indicates the composite curve of the constituent lines shown by thin solid lines.

## Reference

- (R1) Boehm, H. P. Some Aspects of the Surface Chemistry of Carbon Blacks and Other Carbons. *Carbon* **1994**, 32(5), 759-769.
- (R2) Montes-Navajas, P.; Asenjo, N. G.; Santamaría, R.; Menéndez, R.; Corma, A.; García, H. Surface Area Measurement of Graphene Oxide in Aqueous Solutions. *Langmuir* **2013**, 29(44), 13443-13448.
